# Supplementary material for: Assembly of microarrays for genome-wide measurement of DNA copy number
Source: Springer Nature journal article supplement (doi:10.1038/ng754), 2001-10-30
Supplement: ng754-S13.pdf [file ng754-S13.pdf]

**Table I. Summary of Genome-wide Copy Number Variation in Aneuploid Cell Strains**

| Cell line | Karyotype <sup>1</sup>                                                                                                      | Proximal flanking clone    | Proximal flanking STS <sup>2</sup> | Proximal included clone   | Proximal included STS   | Distal included clone     | Distal included STS     | Distal flanking clone    | Distal flanking STS     |
|-----------|-----------------------------------------------------------------------------------------------------------------------------|----------------------------|------------------------------------|---------------------------|-------------------------|---------------------------|-------------------------|--------------------------|-------------------------|
| GM03563   | 46,XY,-9,+der(9)t(3;9)(9qter>9p24::3q12>3qter)mat<br>Trisomy 3q12-3qter<br>Monosomy 9pter-9p24                              | RP11-146e16<br>None        | AFMA059XB5                         | CTD-2014B13<br>CTB-41L13  | stSG9229<br>9 p tel     | GS1-56H22<br>RP11-28N06   | 3 q tel<br>SHGC-1302    | None<br>RP11-122A20      | SHGC-12535              |
| GM00143   | 47,XX,+18<br>Trisomy 18                                                                                                     | None                       |                                    | GS1-74G18                 | 18 p tel                | RP11-507p3                | 18 q tel                | None                     |                         |
| GM05296   | 46,XX,-11,+der(11)inv ins(11;10)(11pter>11p13::10q21>10q24::11p13>11qter)mat<br>Trisomy 10q21-10q24<br>Monosomy 11p12-11p13 | RP11-237j07<br>CTD-2208j5  | SHGC-17478<br>X51630               | RP11-33o02<br>RP11-127K23 | SHGC-10261<br>SHGC-3931 | RP11-128h11<br>RP11-72A10 | SHGC-2001<br>SHGC-20671 | RP11-46g13<br>RP11-18B09 | SHGC-20638<br>AFM270VB1 |
| GM07408   | 47,XX,+20<br>Trisomy 20                                                                                                     | None                       |                                    | RP1-82O2                  | 20 p tel                | RP1-81F12                 | 20 q tel                | None                     |                         |
| GM01750   | 47,XY,+der(14)t(9;14)(14pter>14q21::9p24>9pter)mat<br>Trisomy 9pter-9p24<br>Trisomy 14pter-14q21                            | None<br>None               |                                    | CTB-41L13<br>RP11-14o20   | 9 p tel<br>SHGC-11728   | RP11-33O15<br>RP11-125A05 | SHGC-8727<br>SHGC-1403  | RP11-85J05<br>RP11-48L01 | SHGC-844<br>SHGC-6471   |
| GM03134   | 46,XY,del(8)(pter>q13;q22>qter)<br>Monosomy 8q13-8q22                                                                       | RP11-117N14                | SHGC-586                           | RP11-33D07                | SHGC-13825              | RP11-27115                | SHGC-5171               | RP11-102K07              | SHGC-12502              |
| GM13330   | 46,XY,-4,+der(4)t(1;4)(4pter>4q35::1q25>1qter)mat<br>Trisomy 1q25-1qter<br>Monosomy 4q35-4qter                              | RP11-234m03<br>RP11-272O03 | AFMA129ZF5<br>SHGC4-789            | RP11-28d10<br>RP11-244K02 | AFM063XG9<br>SHGC4-548  | GS1-167K11<br>GS1-31J3    | 1 q tel<br>4 q tel      | None<br>None             |                         |
| GM03576   | 48,XY,+2,+21<br>Trisomy 2<br>Trisomy 21                                                                                     | None<br>None               |                                    | GS1-8L3<br>RP11-31b06     | 2 p tel<br>AFM289YH9    | CTB-172113<br>RP11-135b17 | 2 q tel<br>21 q tel     | None<br>None             |                         |
| GM01535   | 46,XX,-12,+der(12)t(5;12)(12pter>12q24::5q33>5qter)mat<br>Trisomy 5q33-5qter<br>Monosomy 12q24-12qter                       | RP11-210k16<br>RP11-81g12  | AFMA102ZG9<br>SHGC-372             | RP11-88j19<br>RP1-221K18  | AFM211YC7<br>12 q tel   | RP1-240g13<br>None        | 5 q tel                 | None<br>None             |                         |
| GM07081   | 46,XY,-15,+der(7)t(7;15)(7pter>7q11.2::15q11.2>15qter)mat<br>Trisomy 7pter-7q11.2<br>Monosomy 15pter-15q11.2                | None<br>not detected       |                                    | RP1-164D18                | 7 p tel                 | RP11-251115               | AFM191XH6               | RP11-90O18               | SHGC-33722              |
| GM02948   | 47,XY,+13<br>Trisomy 13                                                                                                     | None                       |                                    | RP11-8c15                 | SHGC-37580              | RP1-01L16                 | 13 q tel                | None                     |                         |
| GM04435   | 48,XY,+16,+21<br>Trisomy 16<br>Trisomy 21                                                                                   | None<br>None               |                                    | CTD-2371a5<br>RP11-31b06  | 16 p tel<br>AFM289YH9   | PAC 191p24<br>RP11-135b17 | 16 q tel<br>21 q tel    | None<br>None             |                         |
| GM10315   | 47,XX,+22<br>Trisomy 22                                                                                                     | None                       |                                    | RP1-15j16                 | D22S543                 | CTA-799f10                | 22 q tel                | None                     |                         |
| GM13031   | 46,XY,del(17)(pter>q21.3::q23>qter)<br>Monosomy 17q21.3-17q23                                                               | RP5-1071i14                | D17S797                            | RP11-481c4                | D17S1989                | RP11-670E13               | WI-9306                 | RP11-50F16               | SHGC-34099              |
| GM01524   | 46,XY,-5,+der(5)ins(5;6)(5pter>5q33::6q15>6q25::5q33>5qter)mat<br>Trisomy 6q15-6q25                                         | CTD-2009c06                | stSG6355                           | RP11-2m09                 | AFM295TB3               | RP11-107m03               | AFM198WG11              | RP11-139o22              | AFM059YD6               |

<sup>1</sup>Karyotype as proposed by Coriell

<sup>2</sup>STS = sequence tagged site
